# Supplementary material for: En defensa de un rescate
Source: Royal Society of Chemistry journal article supplement (doi:10.1039/c6dt04290b), 1994-01-01
Supplement: c6dt04290b1.pdf [file c6dt04290b1.pdf]

## Supporting Information

### **Mechanism of activation of amidobenzylidene ruthenium chelates – latent catalysts of olefin metathesis**

Szymon Rogalski, Patrycja Żak, Natalia Tadeuszyk, Krystian Pyta, Piotr Przybylski and Cezary Pietraszuk\*

*Adam Mickiewicz University in Poznań, Faculty of Chemistry, Umultowska 89b, 61-614 Poznań, Poland*

## 1. Optimization of catalyst / activator ratio

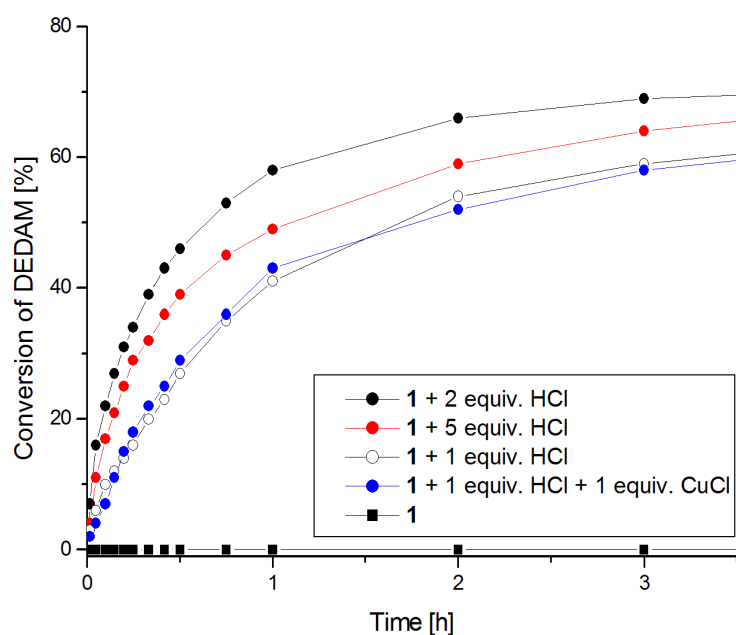

**Figure S1.** RCM of DEDAM. Activation of **1** with HCl (used in equimolar amounts and in excess). Activation of **1** by combined interaction with CuCl and HCl. Reaction conditions:  $\text{CH}_2\text{Cl}_2$ ; 40 °C, 0.1 mol % of [Ru], 0.1 M.

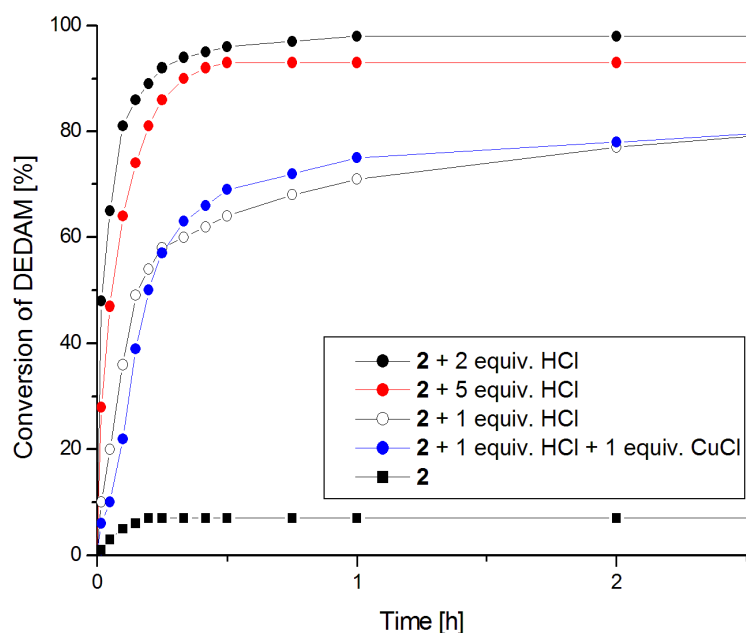

**Figure S2.** Activation of **2** with HCl (used in equimolar amounts and in excess). Activation of **2** by combined interaction with CuCl and HCl. Reaction conditions:  $\text{CH}_2\text{Cl}_2$ ; 40 °C, 0.1 mol % of [Ru], 0.1 M.

## 2. The study of catalytic performance of catalysts **1** and **2** in cross-metathesis of allylbenzene with *Z*-1,4-bis(acetoxy)but-2-ene

*Procedure for the catalytic tests.* The oven dried 5 mL glass reactor equipped with a condenser and magnetic stirring bar was charged under argon with 2 mL of CH<sub>2</sub>Cl<sub>2</sub>, 52 μL of allylbenzene ( $3.92 \times 10^{-4}$  mol), 125 μL of *Z*-1,4-bis(acetoxy)but-2-ene ( $7.83 \times 10^{-4}$  mol) and 40 μL of decane (internal standard). The reaction mixture was placed in an oil bath and preheated to 40 °C. Then 0.0035 g ( $3.9 \times 10^{-6}$  mol) of **1** or 0.00036 g ( $3.9 \times 10^{-7}$  mol) of **2** and 4.0 μL ( $7.8 \times 10^{-6}$  mol) of HCl in Et<sub>2</sub>O (2 M) (for cat. **1**) or 0.4 μL ( $7.8 \times 10^{-7}$  mol) (for cat. **2**) were added under argon. The mixture was heated at 40 °C under a gentle flow of argon. After a given reaction time 30 μL of the reaction mixture was taken, placed in a 1 mL vial and quenched by the addition of 15 μL vinyl ethyl ether and analyzed by Gas Chromatography. The conversion of the substrates was calculated using the internal standard method.

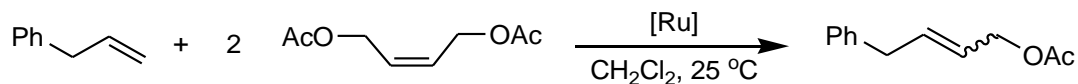

**Scheme S1.** Cross-metathesis of allylbenzene with *Z*-1,4-bis(acetoxy)but-2-ene

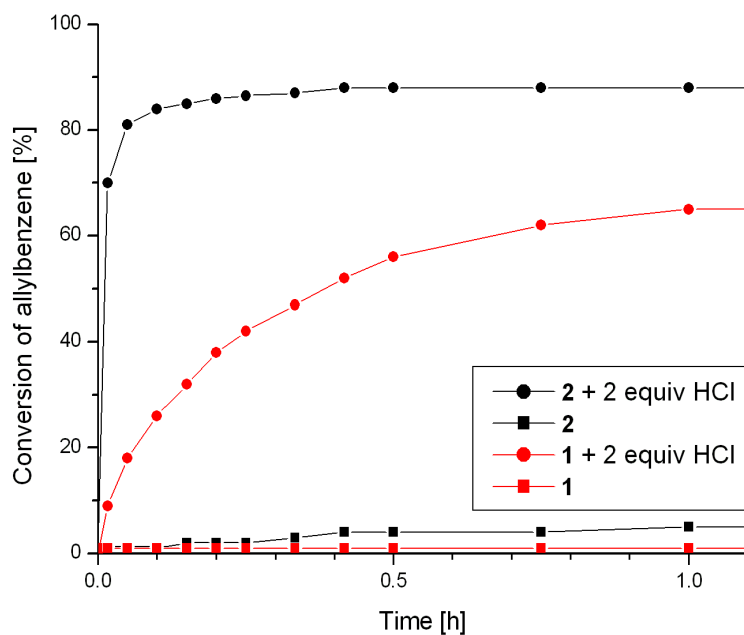

**Figure S3.** CM of allylbenzene with *Z*-1,4-bis(acetoxy)but-2-ene. Effect of addition of HCl/Et<sub>2</sub>O on the reaction course. Reaction conditions: CH<sub>2</sub>Cl<sub>2</sub>; 40 °C, [Ru] : [HCl] = 1 : 2; 1 mol % of **1** related to allylbenzene; 0.1 mol % of **2** related to allylbenzene.

### 3. Complex 1 and 2 stability study

The oven dried 5 mL glass reactor equipped with a condenser and magnetic stirring bar was charged under argon with 2 mL of  $\text{CH}_2\text{Cl}_2$ , 100  $\mu\text{L}$  of cyclooctadiene ( $8.04 \times 10^{-4}$  mol) and 80  $\mu\text{L}$  of dodecane (internal standard). The reaction mixture was placed in an oil bath and preheated to 40 °C. Then 0.0036 g ( $4.02 \times 10^{-6}$  mol) of **1** or 0.000075 g ( $8.04 \times 10^{-8}$  mol) of **2** was added and the mixture was heated at 40 °C under a gentle flow of argon for 1 h. After this time the reaction was analyzed by Gas Chromatography. Then 40  $\mu\text{L}$  ( $8.04 \times 10^{-6}$  mol) of HCl in  $\text{Et}_2\text{O}$  (2 M) (for cat. **1**) or 0.8  $\mu\text{L}$  ( $1.61 \times 10^{-7}$  mol) of HCl in  $\text{Et}_2\text{O}$  (for cat. **2**) were added. After a given reaction time 30  $\mu\text{L}$  of the reaction mixture was taken, placed in a 1 mL vial, quenched by the addition of 30  $\mu\text{L}$  vinyl ethyl ether and analyzed by Gas Chromatography.

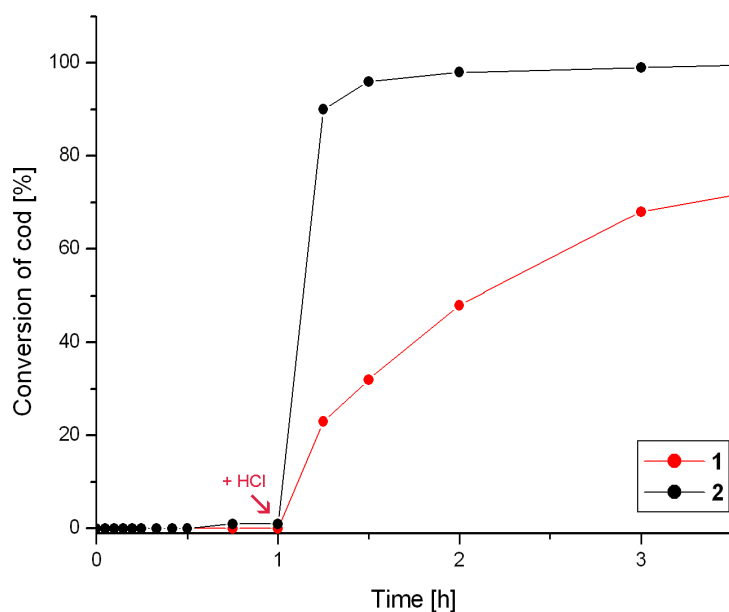

**Figure S4.** Complex **1** and **2** stability study in ROMP of cod and effect of addition of HCl/ $\text{Et}_2\text{O}$  on the reaction course. Reaction conditions:  $\text{CH}_2\text{Cl}_2$ ; 40 °C,  $[\text{Ru}] : [\text{HCl}] = 1 : 2$ ; 0.5 mol % of **1**; 0.01 mol % of **2**.

### 4. Control of ROMP of cod by switching on – switching off the active form of the catalyst

The oven dried 5 mL glass reactor equipped with a condenser and magnetic stirring bar was charged under argon with 2 mL of  $\text{CH}_2\text{Cl}_2$ , 100  $\mu\text{L}$  of cyclooctadiene ( $8.04 \times 10^{-4}$  mol) and 80  $\mu\text{L}$  of dodecane (internal standard). The reaction mixture was placed in an oil bath and preheated to 40 °C. Then 0.0036 g ( $4.02 \times 10^{-6}$  mol) of **1** or 0.000075 g ( $8.04 \times 10^{-8}$  mol) of **2** was added and the mixture was heated at 40 °C under a gentle flow of argon for 1 h. Then 4  $\mu\text{L}$  ( $8.04 \times 10^{-6}$  mol) of HCl in  $\text{Et}_2\text{O}$  (2 M) (for cat. **1**) or 0.08  $\mu\text{L}$  ( $1.61 \times 10^{-7}$  mol) of HCl in  $\text{Et}_2\text{O}$  (for cat. **2**) were added under argon and the reaction was continued for another 1 h for cat. **1** and 0.5 h for cat. **2**. After this time 2 equivalents (0.0023 g for **1** and 0.000045 g for **2**) of  $\text{PCy}_3$  in relation to Ru was added and the reaction mixture was heated for 1 h. Then another portion of HCl in  $\text{Et}_2\text{O}$  (2 M) 4  $\mu\text{L}$  for cat. **1** or 0.08  $\mu\text{L}$  for cat. **2** were added under argon and

the reaction was continued. After a given reaction time 30  $\mu\text{L}$  of the reaction mixture was taken, placed in a 1 mL vial, quenched by the addition of 30  $\mu\text{L}$  vinyl ethyl ether and analyzed by Gas Chromatography.

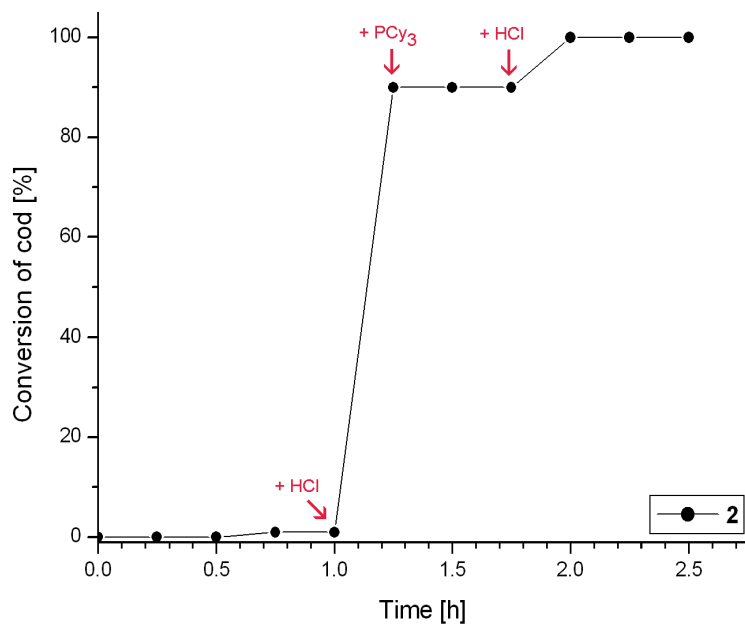

**Figure S5.** Control of ROMP of cod performed in the presence of catalyst **2**. Reaction conditions:  $[\text{Ru}] : [\text{HCl}] = 1 : 2$ ;  $[\text{Ru}] : [\text{PCy}_3] = 1 : 2$ ; 0.01 mol % of **2** relative to cod.

## 5. $^1\text{H}$ NMR spectra of activated catalyst generated *in situ*

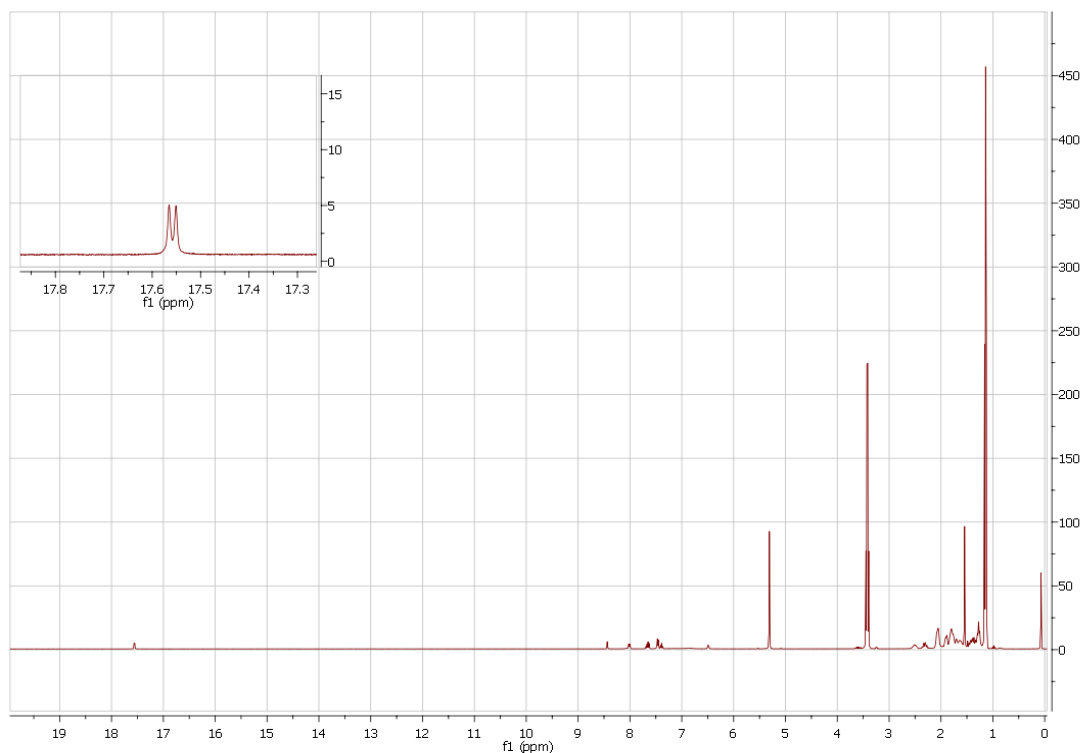

**Figure S6.** Treatment of **1** with 2 equiv of HCl ( $\text{Et}_2\text{O}$  solution).  $^1\text{H}$  NMR spectrum of the reaction mixture. Reaction conditions:  $\text{CH}_2\text{Cl}_2$ ; 22  $^\circ\text{C}$ , 5 min.

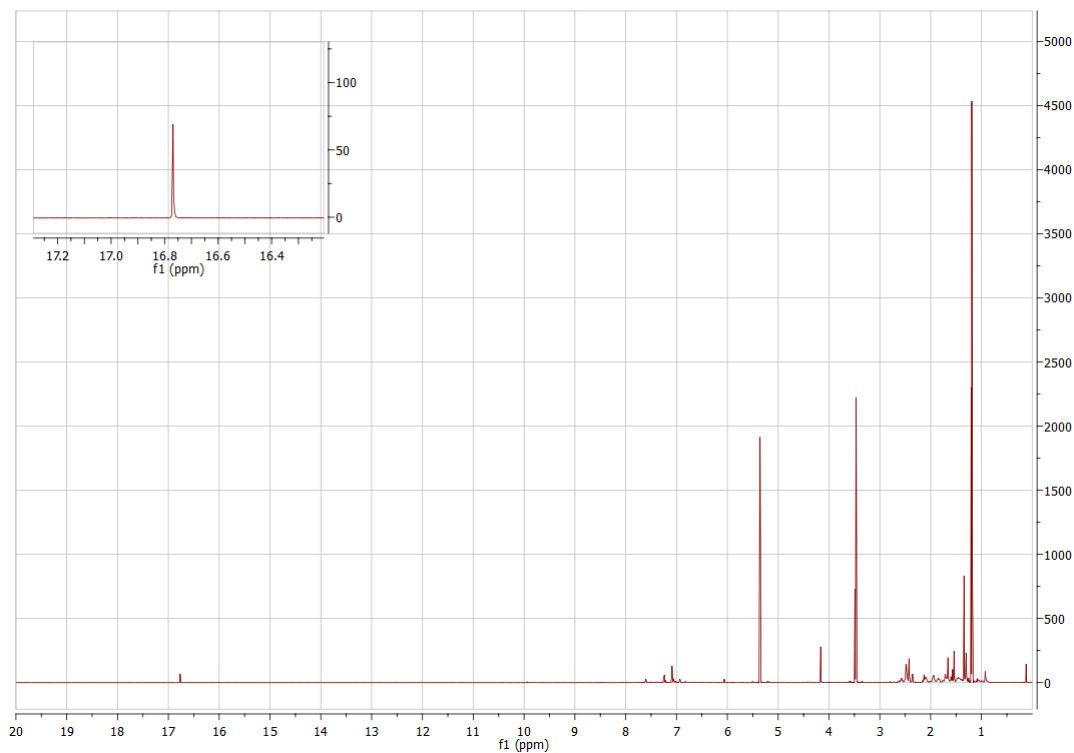

**Figure S7.** Treatment of **2** with 2 equiv of HCl ( $\text{Et}_2\text{O}$  solution).  $^1\text{H}$  NMR spectrum of the reaction mixture. Reaction conditions:  $\text{CH}_2\text{Cl}_2$ ; 22  $^\circ\text{C}$ , 5 min.

## 6. The preliminary studies of activation of catalyst **1** with CIBR<sub>2</sub>.

According to Table 1 (entries 7 and 17) bis(bicyclo[2.2.1]-2-heptyl)chloroborane shows a similar activating effect on complexes **1** and **2** as hydrogen chloride. To get more insight into the activating effect of chloroborane<sup>1</sup> addition on the catalytic activity of amidobenzylidene complexes, complex **1** was reacted with two equivalents of BCIR<sub>2</sub> (where R = bicyclo[2.2.1]-2-heptyl). The reaction was performed in a measuring cell in CH<sub>2</sub>Cl<sub>2</sub> and monitored by FTIR. It was found that the addition of BCIR<sub>2</sub> caused spectral changes similar to those noted in the spectrum of catalyst **4**, i.e. the appearance of  $\nu(\text{C}=\text{O})$  band at 1766 cm<sup>-1</sup> and increase in its intensity, as well as a decrease in the intensity of  $\nu(\text{C}=\text{O})$  band at 1640 cm<sup>-1</sup>. These bands indicate the formation of complex **4**. The results obtained are consistent with NMR experiments, in which addition of two equivalents of BCIR<sub>2</sub> to the solution of **1** in CD<sub>2</sub>Cl<sub>2</sub> revealed rapid formation of complex **4** (doublet at  $\delta = 17.56$  ppm,  $J_{\text{P,H}} = 5.7$  Hz) with the 62 % NMR yield.

## 7. Procedure for IR measurements

The FT-IR spectra of **1**, **2**, **1**+HCl, **2**+HCl and *tert*-butyl *N*-(2-ethenylphenyl)carbamate were recorded in the mid infrared region 4000-400 cm<sup>-1</sup> in CH<sub>2</sub>Cl<sub>2</sub> and CD<sub>2</sub>Cl<sub>2</sub> solutions (0.1 mol L<sup>-1</sup>). A cell with Si windows and wedge-shaped layers was used to avoid interferences (mean layer thickness 170  $\mu\text{m}$ ) for measurements in solution. All spectra were taken with an Nicolet iS50 FT-IR spectrophotometer (Thermo Fisher Scientific, Madison, WI, USA) equipped with a DTGS detector; resolution 1 cm<sup>-1</sup>, 128 scans. The Happ-Genzel apodization function was used. All manipulations with the samples analyzed were performed in argon atmosphere.

## 8. Procedure for DFT calculations

Structures of the activated complexes were calculated by DFT method - DGauss using the B88-LYP GGA energy functional with the DZVP basis sets (Scigress package version FJ. 2.4. EU 3.1.8). The initial model of **1**+HCl and **2**+HCl complexes were built on the basis of determined X-ray structures of non-activated complexes and then optimized via molecular mechanics with MO-MM3/Conflex method. The energetically the most favorable and initially optimized structures of **1**+HCl and **2**+HCl were at the next step optimized with DFT method - B88-LYP GGA energy functional with the DZVP basis sets with the energy gradient not exceeding 0.05 kcal mol<sup>-1</sup> at one step. For the most favored **1**+HCl and **2**+HCl structures shown in Figures 5 and 6, characterized by the most negative change values of enthalpy of formation ( $\Delta H^{\circ}$ ), the frequencies of  $\nu(\text{C}=\text{O})$  IR transitions were calculated by one of DFT methods - B88-LYP GGA energy functional with the DZVP basis sets Compute Engine FJ. 2.4 (EU 3.1.8), Fujitsu 2008-2015.

1 E. Vedrenne, H. Dupont, S. Oualef, L. Elkaïm, L. Grimaud, *Synlett*, 2005, 670–672.
